# Supplementary material
Source: PubMed Central journal article supplement (PMC1693696)

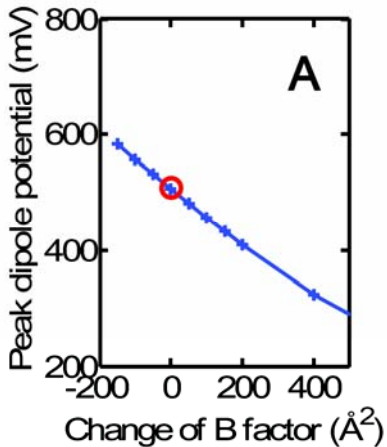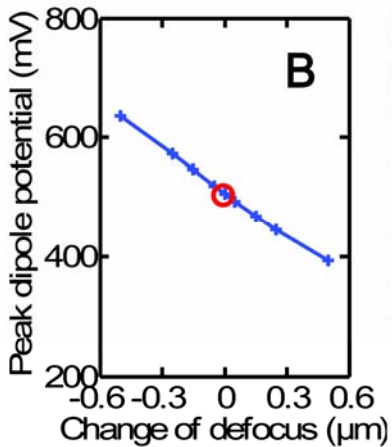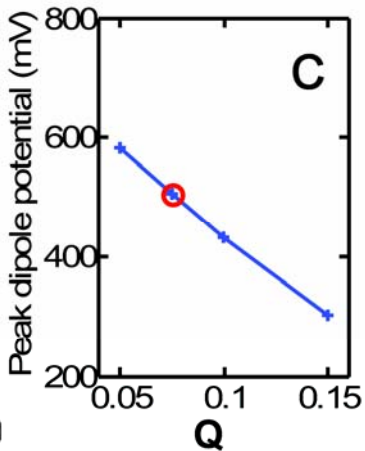

Supplement: pnas_0608714103_1.pdf [file pnas_0608714103_1.pdf]
